# Supplementary material
Source: ML conference proceedings conference paper supplement (https://proceedings.mlr.press/v84/xu18b.html)
Supplement: Supplementary file [file xu18b-supp.pdf]

---

# Supplementary Material for “On Truly Block Eigensolvers via Riemannian Optimization”

---

Zhiqiang Xu  
zhiqiangxu2001@gmail.com

For ease of exposition, we use  $\rho, \eta, \xi$  to represent positive numerical constants with possibly varying values at different places or cases even in the same line.

## Part A: Getting Started

We start from defining a unified update as

$$\mathbf{X}_{t+1} = R(\mathbf{X}_t, \alpha_{t+1} \tilde{\nabla} f(\mathbf{X}_t) + \alpha_{t+1} \mathbf{W}_t),$$

where  $\mathbf{W}_t$  represents the stochastic zero-mean term. Specifically,

$$\mathbf{W}_t = \begin{cases} \mathbf{0}, & \text{Solver 1} \\ (\mathbf{I} - \mathbf{X}_t \mathbf{X}_t^\top)(\mathbf{A}_{t+1} - \mathbf{A})\mathbf{X}_t, & \text{Solver 2} \\ (\mathbf{I} - \mathbf{X}_t \mathbf{X}_t^\top)(\mathbf{A}_{t+1} - \mathbf{A})(\mathbf{X}_t - \tilde{\mathbf{X}}\mathbf{B}_t) + \\ (\mathbf{I} - \mathbf{X}_t \mathbf{X}_t^\top)\tilde{\mathbf{X}}\tilde{\mathbf{X}}^\top(\mathbf{A}_{t+1} - \mathbf{A})\tilde{\mathbf{X}}\mathbf{B}_t - \\ \mathbf{X}_t \text{skew}(\mathbf{X}_t^\top(\mathbf{I} - \tilde{\mathbf{X}}\tilde{\mathbf{X}}^\top)(\mathbf{A}_{t+1} - \mathbf{A})\tilde{\mathbf{X}}\mathbf{B}_t), & \text{Solver 3} \end{cases}.$$

Without loss of generality, assume that  $l \geq k$ . We then can write

$$\det(\mathbf{X}_t^\top \mathbf{V}_l \mathbf{V}_l^\top \mathbf{X}_t) = \frac{\det(a_1(\mathbf{X}_t) + b_1(\mathbf{W}_t))}{\det(a_2(\mathbf{X}_t) + b_2(\mathbf{W}_t))},$$

where

$$\begin{aligned} \mathbf{Y}_t &= \mathbf{X}_t + \alpha_{t+1} \tilde{\nabla} f(\mathbf{X}_t), \\ a_1(\mathbf{X}_t) &= \mathbf{Y}_t^\top \mathbf{V}_l \mathbf{V}_l^\top \mathbf{Y}_t, \\ b_1(\mathbf{W}_t) &= 2\alpha_{t+1} \text{sym}(\mathbf{Y}_t^\top \mathbf{V}_l \mathbf{V}_l^\top \mathbf{W}_t) + \alpha_{t+1}^2 \mathbf{W}_t^\top \mathbf{V}_l \mathbf{V}_l^\top \mathbf{W}_t, \\ a_2(\mathbf{X}_t) &= \mathbf{Y}_t^\top \mathbf{Y}_t + \alpha_{t+1}^2 \mathbf{W}_t^\top \mathbf{W}_t, \\ b_2(\mathbf{W}_t) &= 2\alpha_{t+1} \text{sym}(\mathbf{Y}_t^\top \mathbf{W}_t), \end{aligned}$$

and

$$\mathbb{E}[b_1(\mathbf{W}_t)|\mathbf{X}_t] \succeq \mathbf{0}, \quad \mathbb{E}[b_2(\mathbf{W}_t)|\mathbf{X}_t] = \mathbf{0}.$$

Due to  $\mathbf{W}_t^\top \mathbf{W}_t \preceq \beta_t \mathbf{I}$ , we have

$$\det(\mathbf{X}^\top \mathbf{V}_l \mathbf{V}_l^\top \mathbf{X}) \geq \frac{\det(a_1(\mathbf{X}_t) + b_1(\mathbf{W}_t))}{\det(a_2(\mathbf{X}_t) + b_2(\mathbf{W}_t))},$$

where now

$$a_2(\mathbf{X}_t) = \mathbf{Y}_t^\top \mathbf{Y}_t + \alpha_{t+1}^2 \beta_t \mathbf{I}$$

with a bit abuse of notation, and conditioned on  $\mathbf{X}_t$  for  $i = 1, 2$ ,  $a_i(\mathbf{X}_t)$  are deterministic functions of  $\mathbf{X}_t$  while  $b_i(\mathbf{W}_t)$  are stochastic functions of  $\mathbf{W}_t$ .

## Part B. Auxiliary Lemmas

**Lemma B.1.** For any  $\mathbf{X} \in \text{St}(n, k)$  and  $\mathbf{Y} \in \text{St}(n, l)$ ,

$$\Psi(\mathbf{X}, \mathbf{Y}) \leq \Theta(\mathbf{X}, \mathbf{Y}) = \min\{k, l\} - \|\mathbf{X}^\top \mathbf{Y}\|_F^2 \leq \min\{k, l\} \Psi(\mathbf{X}, \mathbf{Y}).$$

*Proof.* Let  $p = \min\{k, l\}$ . Note that

$$\Psi(\mathbf{X}, \mathbf{Y}) = 1 - \prod_{i=1}^p \cos^2 \theta_i \quad \text{and} \quad \Theta(\mathbf{X}, \mathbf{Y}) = p - \sum_{i=1}^p \cos^2 \theta_i.$$

We prove the left inequality by induction. When  $p = 1$ ,

$$\Psi(\mathbf{X}, \mathbf{Y}) = 1 - \cos^2 \theta_1 = \Theta(\mathbf{X}, \mathbf{Y}).$$

Given  $\Psi(\mathbf{X}, \mathbf{Y}) \leq \Theta(\mathbf{X}, \mathbf{Y})$  for  $p$ , then for  $p + 1$ ,

$$\begin{aligned} \Theta(\mathbf{X}, \mathbf{Y}) &= p + 1 - \sum_{i=1}^{p+1} \cos^2 \theta_i \\ &= p - \sum_{i=1}^p \cos^2 \theta_i + 1 - \cos^2 \theta_{p+1} \\ &\geq 1 - \prod_{i=1}^p \cos^2 \theta_i + 1 - \cos^2 \theta_{p+1} - \left(1 - \prod_{i=1}^{p+1} \cos^2 \theta_i\right) + 1 - \prod_{i=1}^{p+1} \cos^2 \theta_i \\ &= (1 - \cos^2 \theta_{p+1}) \left(1 - \prod_{i=1}^p \cos^2 \theta_i\right) + 1 - \prod_{i=1}^{p+1} \cos^2 \theta_i \\ &\geq 1 - \prod_{i=1}^{p+1} \cos^2 \theta_i = \Psi(\mathbf{X}, \mathbf{Y}). \end{aligned}$$

For the right inequality, by the generalized mean inequality, we have

$$\sum_{i=1}^p \cos^2 \theta_i = p \left( \frac{\sum_{i=1}^p \cos^2 \theta_i}{p} \right)^{\frac{1}{2} \cdot 2} \geq p \left( \prod_{i=1}^p \cos^2 \theta_i \right)^{\frac{2}{p}} \geq p \left( \prod_{i=1}^p \cos \theta_i \right)^2.$$

Thus, we get

$$\Theta(\mathbf{X}, \mathbf{Y}) \leq p - p \left( \prod_{i=1}^p \cos \theta_i \right)^2 = p \left( 1 - \prod_{i=1}^p \cos^2 \theta_i \right) = p \Psi(\mathbf{X}, \mathbf{Y}).$$

□

**Lemma B.2.** For any  $\mathbf{X}, \mathbf{Y}, \mathbf{Z} \in \text{Grass}(n, k)$ ,

$$\Psi^{\frac{1}{2}}(\mathbf{X}, \mathbf{Y}) \leq \Psi^{\frac{1}{2}}(\mathbf{X}, \mathbf{Z}) + \Psi^{\frac{1}{2}}(\mathbf{Z}, \mathbf{Y}).$$

*Proof.* Let  $\mathbf{x} \in \mathbb{R}^{\binom{n}{k}}$  be a column vector of all the  $k \times k$  minors<sup>1</sup> of  $\mathbf{X}$  in certain order. Similarly, let  $\mathbf{y}$  and  $\mathbf{z}$  be the counterparts for  $\mathbf{Y}$  and  $\mathbf{Z}$ , respectively, with minors placed in the same order as  $\mathbf{x}$ . According to the Binet-Cauchy formula, we have  $\det(\mathbf{X}^\top \mathbf{Y}) = \mathbf{x}^\top \mathbf{y}$ . Then for any  $\mathbf{X}, \mathbf{Y}, \mathbf{Z} \in \text{Grass}(n, k)$ , we have

$$\|\mathbf{x}\mathbf{x}^\top - \mathbf{y}\mathbf{y}^\top\|_F \leq \|\mathbf{x}\mathbf{x}^\top - \mathbf{z}\mathbf{z}^\top\|_F + \|\mathbf{z}\mathbf{z}^\top - \mathbf{y}\mathbf{y}^\top\|_F,$$

<sup>1</sup>A  $k \times k$  minor of a matrix  $\mathbf{A}$  is the determinant of a  $k \times k$  sub-matrix in  $\mathbf{A}$ .

where

$$\begin{aligned}\|\mathbf{xx}^\top - \mathbf{yy}^\top\|_F^2 &= \text{tr}(\mathbf{xx}^\top \mathbf{xx}^\top) - 2\text{tr}(\mathbf{xx}^\top \mathbf{yy}^\top) + \text{tr}(\mathbf{yy}^\top \mathbf{yy}^\top) \\ &= \det^2(\mathbf{X}^\top \mathbf{X}) - 2\det^2(\mathbf{X}^\top \mathbf{Y}) + \det^2(\mathbf{Y}^\top \mathbf{Y}) \\ &= 2(1 - \det^2(\mathbf{X}^\top \mathbf{Y})).\end{aligned}$$

Thus, we get

$$(1 - \det^2(\mathbf{X}^\top \mathbf{Y}))^{1/2} \leq (1 - \det^2(\mathbf{X}^\top \mathbf{Z}))^{1/2} + (1 - \det^2(\mathbf{Z}^\top \mathbf{Y}))^{1/2}.$$

□

**Remark** The lemma holds on Stiefel manifolds as well.

**Lemma B.3.** Let  $\beta = \max_i \|\tilde{\mathbf{A}}_i - \mathbf{A}\|_F^2$ . Then

$$\|\mathbf{W}_t\|_F^2 \leq \beta_t = \begin{cases} 0, & \text{Solver 1} \\ \beta, & \text{Solver 2} \\ 24k\beta \left( \Psi(\mathbf{X}_t, \mathbf{Y}) + \Psi(\tilde{\mathbf{X}}_{s-1}, \mathbf{Y}) \right), & \text{Solver 3} \end{cases}$$

for any  $\mathbf{Y} \in \text{St}(n, k)$ .

*Proof.* For brevity, we omit subscript  $t$  here. Note that

$$\|\mathbf{AB}\|_F \leq \|\mathbf{A}\|_2 \|\mathbf{B}\|_F \quad \text{and} \quad \|\mathbf{X}\|_2 = \|\mathbf{X}_\perp\|_2 = 1,$$

where  $\mathbf{X}_\perp$  represents the orthogonal complement of  $\mathbf{X}$  in  $\mathbb{R}^{n \times n}$ , i.e.,

$$[\mathbf{X} \ \mathbf{X}_\perp] [\mathbf{X} \ \mathbf{X}_\perp]^\top = [\mathbf{X} \ \mathbf{X}_\perp]^\top [\mathbf{X} \ \mathbf{X}_\perp] = \mathbf{I}.$$

For Solver 1,  $\beta_t = 0$  by definition. For Solver 2, we have

$$\begin{aligned}\|\mathbf{W}\|_F^2 &= \|(\mathbf{I} - \mathbf{X}\mathbf{X}^\top)(\mathbf{A}_{t+1} - \mathbf{A})\mathbf{X}\|_F^2 \\ &= \|\mathbf{X}_\perp \mathbf{X}_\perp^\top (\mathbf{A}_{t+1} - \mathbf{A})\mathbf{X}\|_F^2 \\ &\leq \|\mathbf{X}_\perp\|_2^4 \|\mathbf{A}_{t+1} - \mathbf{A}\|_F^2 \|\mathbf{X}\|_2^2 \\ &= \|\mathbf{A}_{t+1} - \mathbf{A}\|_F^2 \\ &\leq \max_i \|\tilde{\mathbf{A}}_i - \mathbf{A}\|_F^2 \triangleq \beta_t.\end{aligned}$$

For Solver 3, we get

$$\begin{aligned}\|\mathbf{W}\|_F^2 &= \left\| (\mathbf{I} - \mathbf{X}\mathbf{X}^\top)(\mathbf{A}_{t+1} - \mathbf{A}) \begin{pmatrix} \mathbf{X} - \tilde{\mathbf{X}}\mathbf{Q} \\ + (\mathbf{I} - \mathbf{X}\mathbf{X}^\top) \tilde{\mathbf{X}}\tilde{\mathbf{X}}^\top (\mathbf{A}_{t+1} - \mathbf{A}) \tilde{\mathbf{X}}\mathbf{Q} \\ - \mathbf{X}\text{skew} \left( \mathbf{X}^\top (\mathbf{I} - \tilde{\mathbf{X}}\tilde{\mathbf{X}}^\top) (\mathbf{A}_{t+1} - \mathbf{A}) \tilde{\mathbf{X}}\mathbf{Q} \right) \end{pmatrix} \right\|_F^2 \\ &\leq \beta \left( \|\mathbf{X} - \tilde{\mathbf{X}}\mathbf{Q}\|_F + \|\mathbf{X}_\perp^\top \tilde{\mathbf{X}}\|_F + \|\mathbf{X}^\top \tilde{\mathbf{X}}_\perp\|_F \right)^2 \\ &\leq 3\beta \left( \|\mathbf{X} - \tilde{\mathbf{X}}\mathbf{Q}\|_F^2 + \|\mathbf{X}_\perp^\top \tilde{\mathbf{X}}\|_F^2 + \|\mathbf{X}^\top \tilde{\mathbf{X}}_\perp\|_F^2 \right).\end{aligned}$$

For the first term above, we have

$$\begin{aligned}\|\mathbf{X} - \tilde{\mathbf{X}}\mathbf{B}\|_F^2 &= 2 \left( k - \text{tr}(\mathbf{X}^\top \tilde{\mathbf{X}}\mathbf{B}) \right) = 2 \left( k - \text{tr}(\hat{\mathbf{P}}\mathbf{\Lambda}\check{\mathbf{P}}^\top \check{\mathbf{P}}\hat{\mathbf{P}}^\top) \right) \\ &\leq 2 \left( k - \text{tr}(\mathbf{\Lambda}^2) \right) = 2 \left( k - \|\mathbf{X}^\top \tilde{\mathbf{X}}\|_F^2 \right) \\ &= 2\Theta(\mathbf{X}, \mathbf{Y}) \leq 2k\Psi(\mathbf{X}, \mathbf{Y}) \\ &\leq 4k \left( \Psi(\mathbf{X}, \mathbf{Y}) + \Psi(\mathbf{Y}, \tilde{\mathbf{X}}) \right). \quad (\text{Lemmas A.1-A.2})\end{aligned}$$

For the second term, it could be derived as follows,

$$\begin{aligned}
 \left\| \mathbf{X}_\perp^\top \tilde{\mathbf{X}} \right\|_F^2 &= \left\| \mathbf{X}_\perp^\top (\mathbf{Y}\mathbf{Y}^\top + \mathbf{Y}_\perp \mathbf{Y}_\perp^\top) \tilde{\mathbf{X}} \right\|_F^2 \\
 &\leq \left( \left\| \mathbf{X}_\perp^\top \mathbf{Y} \right\|_F \|\mathbf{Y}\|_2 \left\| \tilde{\mathbf{X}} \right\|_2 + \|\mathbf{X}_\perp\|_2 \|\mathbf{Y}_\perp\|_2 \left\| \mathbf{Y}_\perp^\top \tilde{\mathbf{X}} \right\|_F \right)^2 \\
 &= \left( \left( k - \left\| \mathbf{X}^\top \mathbf{Y} \right\|_F^2 \right)^{1/2} + \left( k - \left\| \mathbf{Y}^\top \tilde{\mathbf{X}} \right\|_F^2 \right)^{1/2} \right)^2 \\
 &\leq 2 \left( k - \left\| \mathbf{X}^\top \mathbf{Y} \right\|_F^2 + k - \left\| \tilde{\mathbf{X}}^\top \mathbf{Y} \right\|_F^2 \right) \\
 &\leq 2k \left( \Psi(\mathbf{X}, \mathbf{Y}) + \Psi(\tilde{\mathbf{X}}, \mathbf{Y}) \right). \quad (\text{Lemmas A.1})
 \end{aligned}$$

Similarly, we have  $\left\| \mathbf{X}^\top \tilde{\mathbf{X}}_\perp \right\|_F^2 \leq 2k \left( \Psi(\mathbf{X}, \mathbf{Y}) + \Psi(\tilde{\mathbf{X}}, \mathbf{Y}) \right)$  for the last term. Therefore, we can write

$$\|\mathbf{W}\|_F^2 \leq 24k\beta \left( \Psi(\mathbf{X}, \mathbf{Y}) + \Psi(\tilde{\mathbf{X}}_{s-1}, \mathbf{Y}) \right).$$

□

**Remark** We have  $0 \leq \beta_t \leq 48k\beta$  as  $\Psi(\mathbf{X}, \mathbf{Y}), \Psi(\tilde{\mathbf{X}}_{s-1}, \mathbf{Y}) \in [0, 1]$ .

**Lemma B.4.** Let  $a = \|\mathbf{A}\|_2$  and  $l \geq k$ . If  $\det(\mathbf{X}_t^\top \mathbf{V}_l \mathbf{V}_l^\top \mathbf{X}_t) > \gamma$  and  $2\alpha_{t+1}\delta_t + 2\alpha_{t+1}\beta_t^{1/2}(1 + \alpha_{t+1}\delta_t) < \gamma$ ,  $0 < \gamma < 1$ , then

$$\mathbb{E}[\det(\mathbf{X}_{t+1}^\top \mathbf{V}_l \mathbf{V}_l^\top \mathbf{X}_{t+1}) | \mathbf{X}_t] \geq \frac{\det(a_1(\mathbf{X}_t))}{\det(a_2(\mathbf{X}_t))} - \alpha_{t+1}^2 \xi_t \beta_t,$$

where  $\delta_t^2 = 4ka^2\Psi(\mathbf{X}_t, \mathbf{V}_k)$  and

$$\begin{aligned}
 \xi_t &= \frac{2k+1}{2} \left( \frac{(1 + \alpha_{t+1}\delta_t + \alpha_{t+1}\beta_t^{1/2})^2}{1 - 2\alpha_{t+1}\beta_t^{1/2}(1 + \alpha_{t+1}\delta_t)} \right)^k \\
 &\quad \left( \left( \frac{2 + 2\alpha_{t+1}\delta_t + \alpha_{t+1}\beta_t^{1/2}}{\gamma - 2\alpha_{t+1}\delta_t - 2\alpha_{t+1}\beta_t^{1/2}(1 + \alpha_{t+1}\delta_t)} \right)^2 + 4 \left( \frac{1 + \alpha_{t+1}\delta_t}{1 - 2\alpha_{t+1}\beta_t^{1/2}(1 + \alpha_{t+1}\delta_t)} \right)^2 \right).
 \end{aligned}$$

*Proof.* Note that

$$\begin{aligned}
 \det(\mathbf{X}_{t+1}^\top \mathbf{V}_l \mathbf{V}_l^\top \mathbf{X}_{t+1}) &= \frac{\det(a_1(\mathbf{X}_t) + b_1(\mathbf{W}_t))}{\det(a_2(\mathbf{X}_t) + b_2(\mathbf{W}_t))}, \\
 \mathbf{X}_t^\top \tilde{\nabla} f(\mathbf{X}_t) &= \mathbf{X}_t^\top (\mathbf{I} - \mathbf{X}_t \mathbf{X}_t^\top) \mathbf{A} \mathbf{X}_t = \mathbf{0}, \\
 \mathbf{A} &= \mathbf{V}_k \Sigma_k \mathbf{V}_k^\top + \mathbf{V}_k^\perp \Sigma_k^\perp (\mathbf{V}_k^\perp)^\top.
 \end{aligned}$$

Then

$$\begin{aligned}
 \left\| \tilde{\nabla} f(\mathbf{X}_t) \right\|_F^2 &= \left\| \mathbf{X}_t^\perp (\mathbf{X}_t^\perp)^\top \mathbf{A} \mathbf{X}_t \right\|_F^2 \\
 &= \left\| \mathbf{X}_t^\perp (\mathbf{X}_t^\perp)^\top \mathbf{V}_k \Sigma_k \mathbf{V}_k^\top \mathbf{X}_t + \mathbf{X}_t^\perp (\mathbf{X}_t^\perp)^\top \mathbf{V}_k^\perp \Sigma_k^\perp (\mathbf{V}_k^\perp)^\top \mathbf{X}_t \right\|_F^2 \\
 &\leq 2\|\mathbf{A}\|_2^2 \left( \left\| (\mathbf{X}_t^\perp)^\top \mathbf{V}_k \right\|_F^2 + \left\| (\mathbf{V}_k^\perp)^\top \mathbf{X}_t \right\|_F^2 \right) \\
 &\leq 4k\|\mathbf{A}\|_2^2 \Psi(\mathbf{X}_t, \mathbf{V}_k) \\
 &\triangleq \delta_t^2.
 \end{aligned}$$

Next, we have

$$\begin{aligned}
 a_2(\mathbf{X}_t) &= \left( \mathbf{X}_t + \alpha_{t+1} \tilde{\nabla} f(\mathbf{X}_t) \right)^\top \left( \mathbf{X}_t + \alpha_{t+1} \tilde{\nabla} f(\mathbf{X}_t) \right) + \alpha_{t+1}^2 \beta_t \mathbf{I} \\
 &= (1 + \alpha_{t+1}^2 \beta_t) \mathbf{I} + \alpha_{t+1} \left( \mathbf{X}_t^\top \tilde{\nabla} f(\mathbf{X}_t) + \left( \mathbf{X}_t^\top \tilde{\nabla} f(\mathbf{X}_t) \right)^\top \right) + \alpha_{t+1}^2 \tilde{\nabla} f(\mathbf{X}_t)^\top \tilde{\nabla} f(\mathbf{X}_t) \\
 &= (1 + \alpha_{t+1}^2 \beta_t) \mathbf{I} + \alpha_{t+1}^2 (\mathbf{X}_t^\top \mathbf{A} \mathbf{X}_t^\perp) (\mathbf{X}_t^\top \mathbf{A} \mathbf{X}_t^\perp)^\top \\
 &\succcurlyeq (1 + \alpha_{t+1}^2 \beta_t) \mathbf{I} \\
 &\succ \mathbf{0}.
 \end{aligned}$$

On the other hand,  $b_2(\mathbf{W}_t)$  is symmetric and

$$\begin{aligned}
 \|b_2(\mathbf{W}_t)\|_2 &= \left\| \alpha_{t+1} \left( \mathbf{X}_t + \alpha_{t+1} \tilde{\nabla} f(\mathbf{X}_t) \right)^\top \mathbf{W}_t + \alpha_{t+1} \mathbf{W}_t^\top \left( \mathbf{X}_t + \alpha_{t+1} \tilde{\nabla} f(\mathbf{X}_t) \right) \right\|_2 \\
 &\leq 2\alpha_{t+1} \left\| \mathbf{X}_t + \alpha_{t+1} \tilde{\nabla} f(\mathbf{X}_t) \right\|_2 \|\mathbf{W}_t\|_2 \\
 &\leq 2\alpha_{t+1} \left( 1 + \alpha_{t+1} \left\| \tilde{\nabla} f(\mathbf{X}_t) \right\|_2 \right) \|\mathbf{W}_t\|_2.
 \end{aligned}$$

Thus, for  $\varsigma \in [0, 1]$ , we get

$$\begin{aligned}
 a_2(\mathbf{X}_t) + \varsigma b_2(\mathbf{W}_t) &\succcurlyeq (1 + \alpha_{t+1}^2 \beta_t) \mathbf{I} - \|b_2(\mathbf{W}_t)\|_2 \mathbf{I} \\
 &= \left( 1 + \alpha_{t+1}^2 \beta_t - 2\alpha_{t+1} \left( 1 + \alpha_{t+1} \left\| \tilde{\nabla} f(\mathbf{X}_t) \right\|_2 \right) \|\mathbf{W}_t\|_2 \right) \mathbf{I} \\
 &\succ \mathbf{0},
 \end{aligned}$$

and now can define the function

$$f(\varsigma) = \frac{\det(a_1(\mathbf{X}_t) + \varsigma b_1(\mathbf{W}_t))}{\det(a_2(\mathbf{X}_t) + \varsigma b_2(\mathbf{W}_t))}, \quad \varsigma \in [0, 1].$$

In a similar vein, we have

$$\begin{aligned}
 &a_1(\mathbf{X}_t) + \varsigma b_1(\mathbf{W}_t) \\
 = &\mathbf{X}_t^\top \mathbf{V}_l \mathbf{V}_l^\top \mathbf{X}_t + \alpha_{t+1} \left( \mathbf{X}_t^\top \mathbf{V}_l \mathbf{V}_l^\top \tilde{\nabla} f(\mathbf{X}_t) + \left( \mathbf{X}_t^\top \mathbf{V}_l \mathbf{V}_l^\top \tilde{\nabla} f(\mathbf{X}_t) \right)^\top \right) + \\
 &\varsigma \alpha_{t+1} \left( \left( \mathbf{X}_t + \alpha_{t+1} \tilde{\nabla} f(\mathbf{X}_t) \right)^\top \mathbf{V}_l \mathbf{V}_l^\top \mathbf{W}_t + \mathbf{W}_t^\top \mathbf{V}_l \mathbf{V}_l^\top \left( \mathbf{X}_t + \alpha_{t+1} \tilde{\nabla} f(\mathbf{X}_t) \right) \right) + \\
 &\alpha_{t+1}^2 \left( \tilde{\nabla} f(\mathbf{X}_t) \right)^\top \mathbf{V}_l \mathbf{V}_l^\top \tilde{\nabla} f(\mathbf{X}_t) + \varsigma \alpha_{t+1}^2 \mathbf{W}_t^\top \mathbf{V}_l \mathbf{V}_l^\top \mathbf{W}_t \\
 \preccurlyeq &\mathbf{I} + \alpha_{t+1} \left\| \mathbf{X}_t^\top \mathbf{V}_l \mathbf{V}_l^\top \tilde{\nabla} f(\mathbf{X}_t) + \left( \mathbf{X}_t^\top \mathbf{V}_l \mathbf{V}_l^\top \tilde{\nabla} f(\mathbf{X}_t) \right)^\top \right\|_2 \mathbf{I} + \\
 &\alpha_{t+1} \left\| \left( \mathbf{X}_t + \alpha_{t+1} \tilde{\nabla} f(\mathbf{X}_t) \right)^\top \mathbf{V}_l \mathbf{V}_l^\top \mathbf{W}_t + \mathbf{W}_t^\top \mathbf{V}_l \mathbf{V}_l^\top \left( \mathbf{X}_t + \alpha_{t+1} \tilde{\nabla} f(\mathbf{X}_t) \right) \right\|_2 \mathbf{I} + \\
 &\alpha_{t+1}^2 \left\| \left( \tilde{\nabla} f(\mathbf{X}_t) \right)^\top \mathbf{V}_l \mathbf{V}_l^\top \tilde{\nabla} f(\mathbf{X}_t) \right\|_2 + \alpha_{t+1}^2 \|\mathbf{W}_t^\top \mathbf{V}_l \mathbf{V}_l^\top \mathbf{W}_t\|_2 \\
 \preccurlyeq &\left( 1 + 2\alpha_{t+1} \left\| \tilde{\nabla} f(\mathbf{X}_t) \right\|_2 + 2\alpha_{t+1} (1 + \alpha_{t+1} \left\| \tilde{\nabla} f(\mathbf{X}_t) \right\|_2) \|\mathbf{W}_t\|_2 + \alpha_{t+1}^2 \left\| \tilde{\nabla} f(\mathbf{X}_t) \right\|_2^2 + \alpha_{t+1}^2 \|\mathbf{W}_t\|_2^2 \right) \mathbf{I} \\
 = &\left( 1 + \alpha_{t+1} \left\| \tilde{\nabla} f(\mathbf{X}_t) \right\|_2 + \alpha_{t+1} \|\mathbf{W}_t\|_2 \right)^2 \mathbf{I}.
 \end{aligned}$$

Moreover, since

$$\det(\mathbf{X}_t^\top \mathbf{V}_l \mathbf{V}_l^\top \mathbf{X}_t) = \prod_{i=1}^k \cos^2 \theta_i \leq \min \cos^2 \theta_i,$$

we have

$$\mathbf{X}_t^\top \mathbf{V}_l \mathbf{V}_l^\top \mathbf{X}_t \succcurlyeq \gamma \mathbf{I}.$$

Then

$$\begin{aligned} & a_1(\mathbf{X}_t) + \varsigma b_1(\mathbf{W}_t) \\ \succcurlyeq & \mathbf{X}_t^\top \mathbf{V}_l \mathbf{V}_l^\top \mathbf{X}_t + \alpha_{t+1} \left( \mathbf{X}_t^\top \mathbf{V}_l \mathbf{V}_l^\top \tilde{\nabla} f(\mathbf{X}_t) + \left( \mathbf{X}_t^\top \mathbf{V}_l \mathbf{V}_l^\top \tilde{\nabla} f(\mathbf{X}_t) \right)^\top \right) + \\ & \varsigma \alpha_{t+1} \left( \left( \mathbf{X}_t + \alpha_{t+1} \tilde{\nabla} f(\mathbf{X}_t) \right)^\top \mathbf{V}_l \mathbf{V}_l^\top \mathbf{W}_t + \mathbf{W}_t^\top \mathbf{V}_l \mathbf{V}_l^\top \left( \mathbf{X}_t + \alpha_{t+1} \tilde{\nabla} f(\mathbf{X}_t) \right) \right) \\ \succcurlyeq & \gamma \mathbf{I} - \alpha_{t+1} \left\| \mathbf{X}_t^\top \mathbf{V}_l \mathbf{V}_l^\top \tilde{\nabla} f(\mathbf{X}_t) + \left( \mathbf{X}_t^\top \mathbf{V}_l \mathbf{V}_l^\top \tilde{\nabla} f(\mathbf{X}_t) \right)^\top \right\|_2 \mathbf{I} - \\ & \alpha_{t+1} \left\| \left( \mathbf{X}_t + \alpha_{t+1} \tilde{\nabla} f(\mathbf{X}_t) \right)^\top \mathbf{V}_l \mathbf{V}_l^\top \mathbf{W}_t + \mathbf{W}_t^\top \mathbf{V}_l \mathbf{V}_l^\top \left( \mathbf{X}_t + \alpha_{t+1} \tilde{\nabla} f(\mathbf{X}_t) \right) \right\|_2 \mathbf{I} \\ \succcurlyeq & \left( \gamma - 2\alpha_{t+1} \left\| \tilde{\nabla} f(\mathbf{X}_t) \right\|_2 - 2\alpha_{t+1} \left( 1 + \alpha_{t+1} \left\| \tilde{\nabla} f(\mathbf{X}_t) \right\|_2 \right) \|\mathbf{W}_t\|_2 \right) \mathbf{I} \\ \succ & \mathbf{0}, \end{aligned}$$

which shows that

$$a_1(\mathbf{X}_t) \succcurlyeq \left( \gamma - 2\alpha_{t+1} \left\| \tilde{\nabla} f(\mathbf{X}_t) \right\|_2 \right) \mathbf{I} \succ \mathbf{0}$$

and both  $a_1(\mathbf{X}_t)$  and  $a_1(\mathbf{X}_t) + \varsigma b_1(\mathbf{W}_t)$  are invertible as well. For brevity, let

$$\mathbf{H}_i = a_i(\mathbf{X}_t) + \varsigma b_i(\mathbf{W}_t), \quad i = 1, 2.$$

Then the first-order and second order derivatives of  $f(\varsigma) = \frac{\det(\mathbf{H}_1)}{\det(\mathbf{H}_2)}$  can be derived as follows,

$$f'(\varsigma) = \left( \frac{d}{d\varsigma} \det(\mathbf{H}_1) \right) \det^{-1}(\mathbf{H}_2) - \det(\mathbf{H}_1) \det^{-2}(\mathbf{H}_2) \left( \frac{d}{d\varsigma} \det(\mathbf{H}_2) \right),$$

and

$$\begin{aligned} f''(\varsigma) &= \left( \frac{d^2}{d\varsigma^2} \det(\mathbf{H}_1) \right) \det^{-1}(\mathbf{H}_2) - 2 \left( \frac{d}{d\varsigma} \det(\mathbf{H}_1) \right) \det^{-2}(\mathbf{H}_2) \left( \frac{d}{d\varsigma} \det(\mathbf{H}_2) \right) \\ &\quad + 2 \det(\mathbf{H}_1) \det^{-3}(\mathbf{H}_2) \left( \frac{d}{d\varsigma} \det(\mathbf{H}_2) \right)^2 - \det(\mathbf{H}_1) \det^{-2}(\mathbf{H}_2) \left( \frac{d^2}{d\varsigma^2} \det(\mathbf{H}_2) \right). \end{aligned}$$

Note that for an invertible matrix function  $\mathbf{F}(x)$  of scalar variable  $x$ ,

$$\frac{d}{dx} \det(\mathbf{F}(x)) = \det(\mathbf{F}(x)) \operatorname{tr} \left( \mathbf{F}^{-1}(x) \frac{d}{dx} \mathbf{F}(x) \right) \quad \text{and} \quad \frac{d}{dx} \mathbf{F}^{-1}(x) = -\mathbf{F}^{-1}(x) \left( \frac{d}{dx} \mathbf{F}(x) \right) \mathbf{F}^{-1}(x).$$

Hence, we can write

$$\begin{aligned} \frac{d}{d\varsigma} \det(\mathbf{H}_i) &= \det(\mathbf{H}_i) \operatorname{tr} \left( \mathbf{H}_i^{-1} b_i(\mathbf{W}_t) \right), \\ \frac{d^2}{d\varsigma^2} \det(\mathbf{H}_i) &= \det(\mathbf{H}_i) \operatorname{tr}^2 \left( \mathbf{H}_i^{-1} b_i(\mathbf{W}_t) \right) - \det(\mathbf{H}_i) \operatorname{tr} \left( \left( \mathbf{H}_i^{-1} b_i(\mathbf{W}_t) \right)^2 \right), \end{aligned}$$

and then

$$f'(\varsigma) = \det(\mathbf{H}_1) \det^{-1}(\mathbf{H}_2) \left( \operatorname{tr} \left( \mathbf{H}_1^{-1} b_1(\mathbf{W}_t) \right) - \operatorname{tr} \left( \mathbf{H}_2^{-1} b_2(\mathbf{W}_t) \right) \right),$$

and

$$\begin{aligned}
 & f''(\varsigma) \\
 = & \det(\mathbf{H}_1) \det^{-1}(\mathbf{H}_2) \left( \text{tr}^2(\mathbf{H}_1^{-1}b_1(\mathbf{W}_t)) - \text{tr}\left(\left(\mathbf{H}_1^{-1}b_1(\mathbf{W}_t)\right)^2\right) - \right. \\
 & \left. 2\text{tr}(\mathbf{H}_1^{-1}b_1(\mathbf{W}_t)) \text{tr}(\mathbf{H}_2^{-1}b_2(\mathbf{W}_t)) + \text{tr}^2(\mathbf{H}_2^{-1}b_2(\mathbf{W}_t)) + \text{tr}\left(\left(\mathbf{H}_2^{-1}b_2(\mathbf{W}_t)\right)^2\right) \right) \\
 = & \frac{\det(\mathbf{H}_1)}{\det(\mathbf{H}_2)} \left( \left( \text{tr}(\mathbf{H}_1^{-1}b_1(\mathbf{W}_t)) - \text{tr}(\mathbf{H}_2^{-1}b_2(\mathbf{W}_t)) \right)^2 - \text{tr}\left(\left(\mathbf{H}_1^{-1}b_1(\mathbf{W}_t)\right)^2\right) + \text{tr}\left(\left(\mathbf{H}_2^{-1}b_2(\mathbf{W}_t)\right)^2\right) \right).
 \end{aligned}$$

Thus, we get

$$f'(0) = \frac{\det(a_1(\mathbf{X}_t))}{\det(a_2(\mathbf{X}_t))} \left( \text{tr}(a_1^{-1}(\mathbf{X}_t)b_1(\mathbf{W}_t)) - \text{tr}(a_2^{-1}(\mathbf{X}_t)b_2(\mathbf{W}_t)) \right),$$

and

$$\begin{aligned}
 & |f''(\varsigma)| \\
 \leq & \frac{\det(\mathbf{H}_1)}{\det(\mathbf{H}_2)} \left( 2\text{tr}^2(\mathbf{H}_1^{-1}b_1(\mathbf{W}_t)) + 2\text{tr}^2(\mathbf{H}_2^{-1}b_2(\mathbf{W}_t)) + \text{tr}\left(\left(\mathbf{H}_1^{-1}b_1(\mathbf{W}_t)\right)^2\right) + \text{tr}\left(\left(\mathbf{H}_2^{-1}b_2(\mathbf{W}_t)\right)^2\right) \right) \\
 \leq & (2k+1) \frac{\det(\mathbf{H}_1)}{\det(\mathbf{H}_2)} \left( \text{tr}\left(\left(\mathbf{H}_1^{-1}b_1(\mathbf{W}_t)\right)^2\right) + \text{tr}\left(\left(\mathbf{H}_2^{-1}b_2(\mathbf{W}_t)\right)^2\right) \right),
 \end{aligned}$$

by the Cauchy-Schwartz inequality. In particular, since  $a_1(\mathbf{X}_t) \succ \mathbf{0}$  and  $\mathbb{E}[b_1(\mathbf{W}_t)|\mathbf{X}_t] \succcurlyeq \mathbf{0}$ , we have

$$\mathbb{E}[\text{tr}(a_1^{-1}(\mathbf{X}_t)b_1(\mathbf{W}_t))|\mathbf{X}_t] = \text{tr}(a_1^{-1}(\mathbf{X}_t)\mathbb{E}[b_1(\mathbf{W}_t)|\mathbf{X}_t]) \geq 0,$$

and thus

$$\mathbb{E}[f'(0)|\mathbf{X}_t] = \frac{\det(a_1(\mathbf{X}_t))}{\det(a_2(\mathbf{X}_t))} \left( \text{tr}(a_1^{-1}(\mathbf{X}_t)\mathbb{E}[b_1(\mathbf{W}_t)|\mathbf{X}_t]) - \text{tr}(a_2^{-1}(\mathbf{X}_t)\mathbb{E}[b_2(\mathbf{W}_t)|\mathbf{X}_t]) \right) \geq 0.$$

In addition, note that

$$\begin{aligned}
 \frac{\det(\mathbf{H}_1)}{\det(\mathbf{H}_2)} & \leq \left( \frac{\left(1 + \alpha_{t+1} \left\| \tilde{\nabla} f(\mathbf{X}_t) \right\|_2 + \alpha_{t+1} \|\mathbf{W}_t\|_2\right)^2}{1 + \alpha_{t+1}^2 \beta_t - 2\alpha_{t+1} \left(1 + \alpha_{t+1} \left\| \tilde{\nabla} f(\mathbf{X}_t) \right\|_2\right) \|\mathbf{W}_t\|_2} \right)^k \\
 & \leq \left( \frac{\left(1 + \alpha_{t+1} \left\| \tilde{\nabla} f(\mathbf{X}_t) \right\|_2 + \alpha_{t+1} \beta_t^{1/2}\right)^2}{1 + \alpha_{t+1}^2 \beta_t - 2\alpha_{t+1} \beta_t^{1/2} \left(1 + \alpha_{t+1} \left\| \tilde{\nabla} f(\mathbf{X}_t) \right\|_2\right)} \right)^k,
 \end{aligned}$$

and

$$\begin{aligned}
 & \text{tr}\left(\left(\mathbf{H}_i^{-1}b_i(\mathbf{W}_t)\right)^2\right) \\
 \leq & \left\| \mathbf{H}_i^{-1}b_i(\mathbf{W}_t) \right\|_F^2 \leq \left\| \mathbf{H}_i^{-1} \right\|_2^2 \|b_i(\mathbf{W}_t)\|_F^2 = \frac{\|b_i(\mathbf{W}_t)\|_F^2}{\lambda_{\min}^2(\mathbf{H}_i)} \\
 \leq & \left( \frac{2\alpha_{t+1} \left(1 + \alpha_{t+1} \left\| \tilde{\nabla} f(\mathbf{X}_t) \right\|_2\right) \|\mathbf{W}_t\|_F + \frac{1-(-1)^i}{2} \alpha_{t+1}^2 \|\mathbf{W}_t\|_F^2}{\frac{1-(-1)^i}{2} \left(\gamma - 2\alpha_{t+1} \left\| \tilde{\nabla} f(\mathbf{X}_t) \right\|_2\right) + \frac{1+(-1)^i}{2} (1 + \alpha_{t+1}^2 \beta_t) - 2\alpha_{t+1} \left(1 + \alpha_{t+1} \left\| \tilde{\nabla} f(\mathbf{X}_t) \right\|_2\right) \|\mathbf{W}_t\|_2} \right)^2 \\
 \leq & \left( \frac{2\alpha_{t+1} \beta_t^{1/2} \left(1 + \alpha_{t+1} \left\| \tilde{\nabla} f(\mathbf{X}_t) \right\|_2\right) + \frac{1-(-1)^i}{2} \alpha_{t+1}^2 \beta_t}{\frac{1-(-1)^i}{2} \left(\gamma - 2\alpha_{t+1} \left\| \tilde{\nabla} f(\mathbf{X}_t) \right\|_2\right) + \frac{1+(-1)^i}{2} (1 + \alpha_{t+1}^2 \beta_t) - 2\alpha_{t+1} \beta_t^{1/2} \left(1 + \alpha_{t+1} \left\| \tilde{\nabla} f(\mathbf{X}_t) \right\|_2\right)} \right)^2.
 \end{aligned}$$

Thus  $|f''(\varsigma)|$  can be bounded as follows:

$$\begin{aligned}
 & |f''(\varsigma)| \\
 \leq & (2k+1)\alpha_{t+1}^2\beta_t \left( \frac{\left(1 + \alpha_{t+1}\delta_t + \alpha_{t+1}\beta_t^{1/2}\right)^2}{1 - 2\alpha_{t+1}\beta_t^{1/2}(1 + \alpha_{t+1}\delta_t)} \right)^k \\
 & \left( \left( \frac{2 + 2\alpha_{t+1}\delta_t + \alpha_{t+1}\beta_t^{1/2}}{\gamma - 2\alpha_{t+1}\delta_t - 2\alpha_{t+1}\beta_t^{1/2}(1 + \alpha_{t+1}\delta_t)} \right)^2 + 4 \left( \frac{1 + \alpha_{t+1}\delta_t}{1 - 2\alpha_{t+1}\beta_t^{1/2}(1 + \alpha_{t+1}\delta_t)} \right)^2 \right) \\
 \triangleq & 2\alpha_{t+1}^2\beta_t\xi_t,
 \end{aligned}$$

where we have used that  $\|\tilde{\nabla}f(\mathbf{X}_t)\|_2 \leq \|\tilde{\nabla}f(\mathbf{X}_t)\|_F \leq \delta_t$ . It is easy to see that  $\xi_t$  is a monotonically increasing function with respect to each input variable in their given ranges.

Finally, we could write

$$\begin{aligned}
 & \mathbb{E} \left[ \frac{\det(a_1(\mathbf{X}_t) + b_1(\mathbf{W}_t))}{\det(a_2(\mathbf{X}_t) + b_2(\mathbf{W}_t))} \middle| \mathbf{X}_t \right] \\
 = & \mathbb{E}[f(1)|\mathbf{X}_t] = f(0) + \mathbb{E}[f'(0)|\mathbf{X}_t] + \frac{1}{2}\mathbb{E}[f''(\varsigma)|\mathbf{X}_t], \quad \varsigma \in [0, 1] \\
 \geq & f(0) + \mathbb{E}[f'(0)|\mathbf{X}_t] - \frac{1}{2}\mathbb{E} \left[ \max_{\varsigma \in [0, 1]} |f''(\varsigma)| \middle| \mathbf{X}_t \right] \\
 \geq & f(0) - \alpha_{t+1}^2\beta_t\xi_t = \frac{\det(a_1(\mathbf{X}_t))}{\det(a_2(\mathbf{X}_t))} - \alpha_{t+1}^2\beta_t\xi_t.
 \end{aligned}$$

□

**Lemma B.5.** If  $\det(\mathbf{X}_t^\top \mathbf{V}_l \mathbf{V}_l^\top \mathbf{X}_t) > \gamma$  and  $2\alpha_{t+1}\delta_t < \gamma$ ,  $0 < \gamma < 1$ , then

$$\det(a_1(\mathbf{X}_t)) \geq \det(\mathbf{X}_t^\top \mathbf{V}_l \mathbf{V}_l^\top \mathbf{X}_t) + 2\alpha_{t+1}\det(\mathbf{X}_t^\top \mathbf{V}_l \mathbf{V}_l^\top \mathbf{X}_t)E(\mathbf{X}_t) - \eta_t\alpha_{t+1}^2\delta_t^2 \triangleq \varrho_t$$

and

$$\det(a_2(\mathbf{X}_t)) \leq 1 + \zeta_t\alpha_{t+1}^2(k^{1/2}\beta_t + \delta_t^2),$$

where

$$\eta_t = 2(k+1)(1 + \alpha_{t+1}\delta_t)^{2k} \left( \frac{1 + \alpha_{t+1}\delta_t}{\gamma - 2\alpha_{t+1}\delta_t} \right)^2,$$

$$\zeta_t = k(1 + \alpha_{t+1}^2\beta_t + \alpha_{t+1}^2\delta_t^2)^k,$$

$$E(\mathbf{X}_t) = \text{tr}(\mathbf{Q}_{l,t}^\top \boldsymbol{\Sigma}_l \mathbf{Q}_{l,t}) - \text{tr}(\mathbf{X}_t^\top \mathbf{A} \mathbf{X}_t),$$

with  $\boldsymbol{\Sigma}_l = \text{diag}(\lambda_1, \dots, \lambda_l)$  and  $\mathbf{Q}_{l,t}$  from the thin SVD:

$$\mathbf{X}_t^\top \mathbf{V}_l = \mathbf{P}_{l,t} \boldsymbol{\Lambda}_{l,t} \mathbf{Q}_{l,t}^\top,$$

i.e.,  $\mathbf{Q}_{l,t} \in \text{St}(l, k)$ .

*Proof.* Define functions

$$h_1(\varsigma) = \det(a_1(\mathbf{X}_t; \varsigma)) \triangleq \det \left( \left( \mathbf{X}_t + \varsigma\alpha_{t+1}\tilde{\nabla}f(\mathbf{X}_t) \right)^\top \mathbf{V}_l \mathbf{V}_l^\top \left( \mathbf{X}_t + \varsigma\alpha_{t+1}\tilde{\nabla}f(\mathbf{X}_t) \right) \right),$$

$$h_2(\varsigma) = \det(a_2(\mathbf{X}_t; \varsigma)) \triangleq \det \left( \left( \mathbf{X}_t + \varsigma^{1/2}\alpha_{t+1}\tilde{\nabla}f(\mathbf{X}_t) \right)^\top \left( \mathbf{X}_t + \varsigma^{1/2}\alpha_{t+1}\tilde{\nabla}f(\mathbf{X}_t) \right) + \varsigma\alpha_{t+1}^2\beta_t\mathbf{I} \right)$$

$$= \det \left( \mathbf{I} + \varsigma\alpha_{t+1}^2 \left( \beta_t\mathbf{I} + \tilde{\nabla}f(\mathbf{X}_t)^\top \tilde{\nabla}f(\mathbf{X}_t) \right) \right),$$



where  $\varsigma \in [0, 1]$ . From the proof of the preceding lemma, we have that for  $i = 1, 2$ ,

$$\begin{aligned} h'_i(\varsigma) &= \det(a_i(\mathbf{X}_t; \varsigma)) \operatorname{tr} \left( a_i^{-1}(\mathbf{X}_t; \varsigma) \frac{d a_i(\mathbf{X}_t; \varsigma)}{d\varsigma} \right) \\ h''_i(\varsigma) &= \det(a_i(\mathbf{X}_t; \varsigma)) \left( \operatorname{tr}^2 \left( a_i^{-1}(\mathbf{X}_t; \varsigma) \frac{d a_i(\mathbf{X}_t; \varsigma)}{d\varsigma} \right) - \operatorname{tr} \left( \left( a_i^{-1}(\mathbf{X}_t; \varsigma) \frac{d a_i(\mathbf{X}_t; \varsigma)}{d\varsigma} \right)^2 \right) \right) \\ &\quad + \det(a_i(\mathbf{X}_t; \varsigma)) \operatorname{tr} \left( a_i^{-1}(\mathbf{X}_t; \varsigma) \frac{d^2 a_i(\mathbf{X}_t; \varsigma)}{d\varsigma^2} \right) \end{aligned}$$

and

$$\begin{aligned} |h''_i(\varsigma)| &\leq (k+1) \det(a_i(\mathbf{X}_t; \varsigma)) \operatorname{tr} \left( \left( a_i^{-1}(\mathbf{X}_t; \varsigma) \frac{d a_i(\mathbf{X}_t; \varsigma)}{d\varsigma} \right)^2 \right) \\ &\leq (k+1) \det(a_i(\mathbf{X}_t; \varsigma)) \left( \frac{\left\| \frac{d a_i(\mathbf{X}_t; \varsigma)}{d\varsigma} \right\|_F^2 + \left\| \frac{d^2 a_i(\mathbf{X}_t; \varsigma)}{d\varsigma^2} \right\|_F \lambda_{\min}(a_i(\mathbf{X}_t; \varsigma))}{\lambda_{\min}^2(a_i(\mathbf{X}_t; \varsigma))} \right). \end{aligned}$$

Note that

$$\begin{aligned} \frac{d a_1(\mathbf{X}_t; \varsigma)}{d\varsigma} &= \alpha_{t+1} \left( \tilde{\nabla} f(\mathbf{X}_t) \right)^\top \mathbf{V}_l \mathbf{V}_l^\top \left( \mathbf{X}_t + \varsigma \alpha_{t+1} \tilde{\nabla} f(\mathbf{X}_t) \right) + \\ &\quad \alpha_{t+1} \left( \mathbf{X}_t + \varsigma \alpha_{t+1} \tilde{\nabla} f(\mathbf{X}_t) \right)^\top \mathbf{V}_l \mathbf{V}_l^\top \tilde{\nabla} f(\mathbf{X}_t), \\ \frac{d^2 a_1(\mathbf{X}_t; \varsigma)}{d\varsigma^2} &= 2\alpha_{t+1} \left( \tilde{\nabla} f(\mathbf{X}_t) \right)^\top \mathbf{V}_l \mathbf{V}_l^\top \left( \tilde{\nabla} f(\mathbf{X}_t) \right), \\ \frac{d a_2(\mathbf{X}_t; \varsigma)}{d\varsigma} &= \alpha_{t+1}^2 \left( \beta_t \mathbf{I} + \tilde{\nabla} f(\mathbf{X}_t)^\top \tilde{\nabla} f(\mathbf{X}_t) \right), \end{aligned}$$

and

$$\begin{aligned} \mathbf{0} \prec (\gamma - 2\alpha_{t+1}\delta_t) \mathbf{I} &\preceq a_1(\mathbf{X}_t; \varsigma) \preceq (1 + \alpha_{t+1}\delta_t)^2 \mathbf{I}, \\ \mathbf{0} \prec \mathbf{I} &\preceq a_2(\mathbf{X}_t; \varsigma) \preceq (1 + \alpha_{t+1}^2\beta_t + \alpha_{t+1}^2\delta_t^2) \mathbf{I}. \end{aligned}$$

Thus, we get

$$\begin{aligned} h'_1(0) &= 2\alpha_{t+1} \det(\mathbf{X}_t^\top \mathbf{V}_l \mathbf{V}_l^\top \mathbf{X}_t) \operatorname{tr} \left( (\mathbf{X}_t^\top \mathbf{V}_l \mathbf{V}_l^\top \mathbf{X}_t)^{-1} \mathbf{X}_t^\top \mathbf{V}_l \mathbf{V}_l^\top \tilde{\nabla} f(\mathbf{X}_t) \right) \\ &= 2\alpha_{t+1} \det(\mathbf{X}_t^\top \mathbf{V}_l \mathbf{V}_l^\top \mathbf{X}_t) \left( \operatorname{tr} \left( (\mathbf{X}_t^\top \mathbf{V}_l \mathbf{V}_l^\top \mathbf{X}_t)^{-1} \mathbf{X}_t^\top \mathbf{V}_l \mathbf{V}_l^\top \mathbf{A} \mathbf{X}_t \right) - \operatorname{tr}(\mathbf{X}_t^\top \mathbf{A} \mathbf{X}_t) \right) \\ &= 2\alpha_{t+1} \det(\mathbf{X}_t^\top \mathbf{V}_l \mathbf{V}_l^\top \mathbf{X}_t) \left( \operatorname{tr} \left( \Sigma_l \mathbf{V}_l^\top \mathbf{X}_t (\mathbf{X}_t^\top \mathbf{V}_l \mathbf{V}_l^\top \mathbf{X}_t)^{-1} \mathbf{X}_t^\top \mathbf{V}_l \right) - \operatorname{tr}(\mathbf{X}_t^\top \mathbf{A} \mathbf{X}_t) \right). \end{aligned}$$

Let  $\mathbf{X}_t^\top \mathbf{V}_l = \mathbf{P}_{l,t} \mathbf{A}_{l,t} \mathbf{Q}_{l,t}^\top \in \mathbf{R}^{k \times l}$  be its thin SVD. Then

$$\mathbf{V}_l^\top \mathbf{X}_t (\mathbf{X}_t^\top \mathbf{V}_l \mathbf{V}_l^\top \mathbf{X}_t)^{-1} \mathbf{X}_t^\top \mathbf{V}_l = \mathbf{Q}_{l,t} \mathbf{Q}_{l,t}^\top.$$

Thus,

$$h'_1(0) = 2\alpha_{t+1} \det(\mathbf{X}_t^\top \mathbf{V}_l \mathbf{V}_l^\top \mathbf{X}_t) \left( \operatorname{tr}(\mathbf{Q}_{l,t}^\top \Sigma_l \mathbf{Q}_{l,t}) - \operatorname{tr}(\mathbf{X}_t^\top \mathbf{A} \mathbf{X}_t) \right).$$

In addition, we have

$$\begin{aligned} 0 \leq h'_2(\varsigma) &= \det(a_2(\mathbf{X}_t; \varsigma)) \operatorname{tr} \left( a_2^{-1}(\mathbf{X}_t; \varsigma) \frac{d a_2(\mathbf{X}_t; \varsigma)}{d\varsigma} \right) \\ &\leq k \det(a_2(\mathbf{X}_t; \varsigma)) \frac{\left\| \frac{d a_2(\mathbf{X}_t; \varsigma)}{d\varsigma} \right\|_F}{\lambda_{\min}(a_2(\mathbf{X}_t; \varsigma))} \\ &\leq k \alpha_{t+1}^2 \left( 1 + \alpha_{t+1}^2 \beta_t + \alpha_{t+1}^2 \delta_t^2 \right)^k \left( k^{1/2} \beta_t + \delta_t^2 \right). \end{aligned}$$

and

$$|h_1''(\varsigma)| \leq 8(k+1)\alpha_{t+1}^2\delta_t^2(1+\alpha_{t+1}\delta_t)^{2k} \left( \frac{1+\alpha_{t+1}\delta_t}{\gamma-2\alpha_{t+1}\delta_t} \right)^2.$$

We now can arrive at

$$\begin{aligned} \det(a_1(\mathbf{X}_t)) &= h_1(1) \\ &= h_1(0) + h_1'(0) + \frac{1}{2}h_1''(\varsigma), \quad \varsigma \in [0, 1] \\ &\geq h_1(0) + h_1'(0) - \frac{1}{2} \max_{\varsigma \in [0,1]} |h_1''(\varsigma)| \\ &\geq \det(\mathbf{X}_t^\top \mathbf{V}_l \mathbf{V}_l^\top \mathbf{X}_t) + 2\alpha_{t+1} \det(\mathbf{X}_t^\top \mathbf{V}_l \mathbf{V}_l^\top \mathbf{X}_t) E(\mathbf{X}_t) \\ &\quad - 4(k+1)\alpha_{t+1}^2\delta_t^2(1+\alpha_{t+1}\delta_t)^{2k} \left( \frac{1+\alpha_{t+1}\delta_t}{\gamma-2\alpha_{t+1}\delta_t} \right)^2, \end{aligned}$$

and

$$\begin{aligned} \det(a_2(\mathbf{X}_t)) &= h_2(1) \\ &\leq h_1(0) + \max_{\varsigma \in [0,1]} |h_1'(\varsigma)| \\ &\leq 1 + k\alpha_{t+1}^2(1+\alpha_{t+1}\beta_t + \alpha_{t+1}^2\delta_t^2)^k (k^{1/2}\beta_t + \delta_t^2). \end{aligned}$$

Let

$$\begin{aligned} \eta_t &= 4(k+1)(1+\alpha_{t+1}\delta_t)^{2k} \left( \frac{1+\alpha_{t+1}\delta_t}{\gamma-2\alpha_{t+1}\delta_t} \right)^2, \\ \zeta_t &= k(1+\alpha_{t+1}^2\beta_t + \alpha_{t+1}^2\delta_t^2)^k. \end{aligned}$$

Then we can write

$$\begin{aligned} \det(a_1(\mathbf{X}_t)) &\geq \det(\mathbf{X}_t^\top \mathbf{V}_l \mathbf{V}_l^\top \mathbf{X}_t) + 2\alpha_{t+1} \det(\mathbf{X}_t^\top \mathbf{V}_l \mathbf{V}_l^\top \mathbf{X}_t) E(\mathbf{X}_t) - \eta_t \alpha_{t+1}^2 \delta_t^2 \\ &\triangleq \varrho_t, \\ \det(a_2(\mathbf{X}_t)) &\leq 1 + \zeta_t \alpha_{t+1}^2 (k^{1/2}\beta_t + \delta_t^2). \end{aligned}$$

□

**Lemma B.6.** Bounded difference of potential functions:

$$|\Psi(\mathbf{X}_{t+1}, \mathbf{V}_l) - \Psi(\mathbf{X}_t, \mathbf{V}_l)| \leq \omega_t \alpha_{t+1},$$

where

$$\omega_t = \frac{2k\beta_t^{1/2}(1+\alpha_{t+1}\delta_t) + \alpha_{t+1}\beta_t}{\gamma-2\alpha_{t+1}\delta_t} + 2k\beta_t^{1/2}(1+\alpha_{t+1}\delta_t) + \alpha_{t+1}\beta_t\xi_t.$$

*Proof.* From the proof of Lemma 3.8, we have that

$$\Psi(\mathbf{X}_{t+1}, \mathbf{V}_l) = f(0) + f'(0) + \frac{1}{2}f''(\varsigma), \quad \varsigma \in [0, 1]$$

where

$$\begin{aligned} f(0) &= \Psi(\mathbf{X}_t, \mathbf{V}_l), \\ f'(0) &= \Psi(\mathbf{X}_t, \mathbf{V}_l) (\text{tr}(a_1^{-1}(\mathbf{X}_t)b_1(\mathbf{W}_t)) - \text{tr}(a_2^{-1}(\mathbf{X}_t)b_2(\mathbf{W}_t))). \end{aligned}$$

and  $|f''(\varsigma)| \leq 2\alpha_{t+1}^2\beta_t\xi_t$ . To bound the difference, we need the following

$$\begin{aligned} \mathbf{0} &\prec (\gamma - 2\alpha_{t+1}\delta_t) \mathbf{I} \preceq a_1(\mathbf{X}_t) \preceq (1 + \alpha_{t+1}\delta_t)^2 \mathbf{I}, \\ \mathbf{0} &\prec \mathbf{I} \preceq a_2(\mathbf{X}_t) = \mathbf{Y}_t^\top \mathbf{Y}_t + \alpha_{t+1}^2 \mathbf{W}_t^\top \mathbf{W}_t \preceq (1 + \alpha_{t+1}^2\beta_t + \alpha_{t+1}^2\delta_t^2) \mathbf{I}, \end{aligned}$$

and

$$\begin{aligned} \|b_1(\mathbf{W}_t)\|_F &\leq 2\alpha_{t+1} \|\text{sym}(\mathbf{Y}_t^\top \mathbf{V}_l \mathbf{V}_l^\top \mathbf{W}_t)\|_F + \alpha_{t+1}^2 \|\mathbf{W}_t^\top \mathbf{V}_l \mathbf{V}_l^\top \mathbf{W}_t\|_F \\ &\leq 2\alpha_{t+1}\beta_t^{1/2}(1 + \alpha_{t+1}\delta_t) + \alpha_{t+1}^2\beta_t, \\ \|b_2(\mathbf{W}_t)\|_F &\leq 2\alpha_{t+1} \|\text{sym}(\mathbf{Y}_t^\top \mathbf{W}_t)\|_F \\ &\leq 2\alpha_{t+1}\beta_t^{1/2}(1 + \alpha_{t+1}\delta_t). \end{aligned}$$

Thus, we get

$$\begin{aligned} &|\Psi(\mathbf{X}_{t+1}, \mathbf{V}_l) - \Psi(\mathbf{X}_t, \mathbf{V}_l)| \\ &\leq |f'(0)| + \frac{1}{2}|f''(\varsigma)| \\ &\leq \frac{k\|b_1(\mathbf{W}_t)\|_F}{\lambda_{\min}(a_1(\mathbf{X}_t))} + \frac{k\|b_2(\mathbf{W}_t)\|_F}{\lambda_{\min}(a_2(\mathbf{X}_t))} + \alpha_{t+1}^2\beta_t\xi_t \\ &\leq \frac{2k\alpha_{t+1}\beta_t^{1/2}(1 + \alpha_{t+1}\delta_t) + \alpha_{t+1}^2\beta_t}{\gamma - 2\alpha_{t+1}\delta_t} + 2k\alpha_{t+1}\beta_t^{1/2}(1 + \alpha_{t+1}\delta_t) + \alpha_{t+1}^2\beta_t\xi_t \\ &= \alpha_{t+1} \left( \frac{2k\beta_t^{1/2}(1 + \alpha_{t+1}\delta_t) + \alpha_{t+1}\beta_t}{\gamma - 2\alpha_{t+1}\delta_t} + 2k\beta_t^{1/2}(1 + \alpha_{t+1}\delta_t) + \alpha_{t+1}\beta_t\xi_t \right). \end{aligned}$$

□

**Lemma B.7.** If  $\det(\mathbf{X}_t^\top \mathbf{V}_l \mathbf{V}_l^\top \mathbf{X}_t) > \gamma$ ,  $0 < \gamma < 1$  and

$$0 < \alpha_{t+1} \leq \min\left\{ \frac{\gamma}{8k^{1/2}(\|\mathbf{A}\|_2 + (4 + \gamma)\beta^{1/2})}, \frac{\gamma^{1/2}}{2k^{1/2}\eta^{1/2}\|\mathbf{A}\|_2} \right\},$$

then

$$\begin{aligned} 2\alpha_{t+1}\delta_t + 2\alpha_{t+1}\beta_t^{1/2}(1 + \alpha_{t+1}\delta_t) &< \gamma/2, & 0 < \eta_t \leq \eta &\triangleq 2(k+1)(1 + \gamma/4)^{2(k+1)}(\gamma/2)^{-2}, \\ 0 < \zeta_t \leq \zeta &\triangleq k(1 + (\gamma/4)^2)^k, & 0 < \xi_t \leq \xi &\triangleq (2k+1)(2 + \gamma/2)^{2(k+1)}(\gamma/2)^{-2}, \\ 0 \leq \varrho_t \leq \varrho &\triangleq 1 + \gamma^{3/2}, & 0 < \omega_t \leq \omega &\triangleq 7k^{3/2}\beta^{1/2}(1 + \frac{\gamma}{4})(\xi + (\frac{\gamma}{4})^{-1}). \end{aligned}$$

*Proof.* First let  $\alpha_{t+1} \leq \frac{\gamma}{8k^{1/2}\|\mathbf{A}\|_2}$ . Then

$$\begin{aligned} 2\alpha_{t+1}\delta_t &= 4\alpha_{t+1}k^{1/2}\|\mathbf{A}\|_2\Psi(\mathbf{X}_t, \mathbf{V}_k) \\ &\leq 4\alpha_{t+1}k^{1/2}\|\mathbf{A}\|_2 \\ &\leq \frac{\gamma}{2}, \end{aligned}$$

and

$$\begin{aligned} &2\alpha_{t+1}\delta_t + 2\alpha_{t+1}\beta_t^{1/2}(1 + \alpha_{t+1}\delta_t) \\ &\leq 4\alpha_{t+1}k^{1/2}\|\mathbf{A}\|_2 + 2\alpha_{t+1}\sqrt{48k\beta}(1 + \frac{\gamma}{4}) \\ &\leq 4k^{1/2}(\|\mathbf{A}\|_2 + (4 + \gamma)\beta^{1/2})\alpha_{t+1} \leq \frac{\gamma}{2}. \end{aligned}$$

Thus, it is easy to see that

$$\begin{aligned}\eta_t &= 2(k+1)(1+\alpha_{t+1}\delta_t)^{2k} \left( \frac{1+\alpha_{t+1}\delta_t}{\gamma-2\alpha_{t+1}\delta_t} \right)^2 \\ &\leq 2(k+1) \left(1+\frac{\gamma}{4}\right)^{2(k+1)} \left(\frac{\gamma}{2}\right)^{-2}.\end{aligned}$$

Since  $\alpha_{t+1}\delta_t + \alpha_{t+1}\beta_t^{1/2} \leq \frac{\gamma}{4}$ , we have

$$\alpha_{t+1}^2\beta_t + \alpha_{t+1}^2\delta_t^2 \leq \left(\alpha_{t+1}\delta_t + \alpha_{t+1}\beta_t^{1/2}\right)^2 \leq \left(\frac{\gamma}{4}\right)^2.$$

Hence, we can write

$$\zeta_t = k \left(1 + \alpha_{t+1}^2\beta_t + \alpha_{t+1}^2\delta_t^2\right)^k \leq k \left(1 + \left(\frac{\gamma}{4}\right)^2\right)^k.$$

For  $\xi_t$  we have

$$\begin{aligned}\xi_t &= \frac{2k+1}{2} \left( \frac{\left(1 + \alpha_{t+1}\delta_t + \alpha_{t+1}\beta_t^{1/2}\right)^2}{1 - 2\alpha_{t+1}\beta_t^{1/2}(1 + \alpha_{t+1}\delta_t)} \right)^k \\ &\quad \left( \left( \frac{2 + 2\alpha_{t+1}\delta_t + \alpha_{t+1}\beta_t^{1/2}}{\gamma - 2\alpha_{t+1}\delta_t - 2\alpha_{t+1}\beta_t^{1/2}(1 + \alpha_{t+1}\delta_t)} \right)^2 + 4 \left( \frac{1 + \alpha_{t+1}\delta_t}{1 - 2\alpha_{t+1}\beta_t^{1/2}(1 + \alpha_{t+1}\delta_t)} \right)^2 \right) \\ &\leq \frac{2k+1}{2} \left( \frac{\left(1 + \frac{\gamma}{4}\right)^2}{1 - \frac{\gamma}{2}} \right)^k \left( \left( \frac{2 + \frac{\gamma}{2}}{\gamma - \frac{\gamma}{2}} \right)^2 + 4 \left( \frac{1 + \frac{\gamma}{4}}{1 - \frac{\gamma}{2}} \right)^2 \right) \\ &\leq \frac{2k+1}{2} \left( \frac{\left(1 + \frac{\gamma}{4}\right)^2}{1 - \frac{1}{2}} \right)^k \left( \left( \frac{2 + \frac{\gamma}{2}}{\gamma - \frac{\gamma}{2}} \right)^2 + 4 \left( \frac{1 + \frac{\gamma}{4}}{\gamma - \frac{\gamma}{2}} \right)^2 \right) \\ &= \frac{2k+1}{2} \left(2 + \frac{\gamma}{2}\right)^{2(k+1)} \left(\frac{\gamma}{2}\right)^{-2}.\end{aligned}$$

For  $\varrho_t$ , on one hand,

$$\begin{aligned}\varrho_t &= \det(\mathbf{X}_t^\top \mathbf{V}_l \mathbf{V}_l^\top \mathbf{X}_t) + 2\alpha_{t+1} \det(\mathbf{X}_t^\top \mathbf{V}_l \mathbf{V}_l^\top \mathbf{X}_t) E(\mathbf{X}_t) - \eta_t \alpha_{t+1}^2 \delta_t^2 \\ &\geq \gamma - 4k\eta \alpha_{t+1}^2 \|\mathbf{A}\|_2^2 \\ &\geq \gamma - 4k\eta \|\mathbf{A}\|_2^2 \left( \frac{\gamma^{1/2}}{2k^{1/2}\eta^{1/2} \|\mathbf{A}\|_2} \right)^2 \\ &= 0.\end{aligned}$$

On the other hand, since  $\alpha_{t+1}^2 \|\mathbf{A}\|_2^2 \leq \frac{\gamma}{4k\eta}$ ,

$$\begin{aligned}\varrho_t &\leq \det(\mathbf{X}_t^\top \mathbf{V}_l \mathbf{V}_l^\top \mathbf{X}_t) + 2\alpha_{t+1} \det(\mathbf{X}_t^\top \mathbf{V}_l \mathbf{V}_l^\top \mathbf{X}_t) E(\mathbf{X}_t) \\ &\leq 1 + 4k\alpha_{t+1} \|\mathbf{A}\|_2 \Psi(\mathbf{X}_t, \mathbf{V}_l) \leq 1 + 4k\alpha_{t+1} \|\mathbf{A}\|_2 \\ &\leq 1 + 4k \sqrt{\frac{\gamma}{4k\eta}} \\ &= 1 + 4k \frac{\frac{\gamma}{2}}{\sqrt{2(k+1)} \left(1 + \frac{\gamma}{4}\right)^{k+1}} \sqrt{\frac{\gamma}{4k}} \\ &\leq 1 + \gamma^{3/2}.\end{aligned}$$

Last, since  $1 + \alpha_{t+1}\delta_t + \alpha_{t+1}\beta_t^{1/2} \leq 1 + \frac{\gamma}{4}$ ,

$$\begin{aligned} 0 < \omega_t &\leq \frac{2k\beta_t^{1/2}(1 + \alpha_{t+1}\delta_t) + \alpha_{t+1}\beta_t}{\gamma - 2\alpha_{t+1}\delta_t} + 2k\beta_t^{1/2}(1 + \alpha_{t+1}\delta_t) + \alpha_{t+1}\beta_t\xi_t \\ &\leq k\frac{2\beta_t^{1/2}(1 + \alpha_{t+1}\delta_t + \alpha_{t+1}\beta_t^{1/2})}{\gamma - 2\alpha_{t+1}\delta_t} + k\beta_t^{1/2}\xi_t(1 + \alpha_{t+1}\delta_t + \alpha_{t+1}\beta_t^{1/2}) \\ &\leq 7k^{3/2}\beta_t^{1/2}(1 + \frac{\gamma}{4})(\xi + (\frac{\gamma}{4})^{-1}). \end{aligned}$$

□

**Lemma B.8.** For any  $\iota \in (0, 1)$ , we have  $\det(\mathbf{X}_t^\top \mathbf{V}_l \mathbf{V}_l^\top \mathbf{X}_t) > \gamma$  all  $t = 1, 2, \dots, t_0$  with probability at least  $1 - \iota$ , provided that  $\alpha_{t+1} \in (0, \rho)$  and  $\rho, t_0$  satisfy

$$\det(\mathbf{X}_t^\top \mathbf{V}_l \mathbf{V}_l^\top \mathbf{X}_t) > \gamma + t_0\rho^2 + \rho^2\sqrt{2t_0 \log(1/\iota)}.$$

*Proof.* Consider the stochastic process  $\{\Psi(\mathbf{X}_0, \mathbf{V}_l), \Psi(\mathbf{X}_1, \mathbf{V}_l), \dots, \Psi(\mathbf{X}_{t_0}, \mathbf{V}_l)\}$  and the filtration  $\mathcal{F} = \{\mathcal{F}_t\}$  induced by random variables  $y_t$ . By Lemmas 4.6 and B.4, we have

$$\begin{aligned} \mathbb{E}[\Psi(\mathbf{X}_{t+1}, \mathbf{V}_l) | \mathbf{X}_t] &\leq \Psi(\mathbf{X}_t, \mathbf{V}_l) - 2\alpha_{t+1}\det(\mathbf{X}_t^\top \mathbf{V}_l \mathbf{V}_l^\top \mathbf{X}_t)E(\mathbf{X}_t) + \\ &\quad (\eta_t + \varrho_t\zeta_t)\alpha_{t+1}^2\delta_t^2 + (k^{1/2}\varrho_t\zeta_t + \xi_t)\alpha_{t+1}^2\beta_t \\ &\leq \Psi(\mathbf{X}_t, \mathbf{V}_l) + \rho^2. \end{aligned}$$

Then we can define

$$\Phi_t = \Psi(\mathbf{X}_t, \mathbf{V}_l) - \rho^2 t$$

for  $t = 0, 1, 2, \dots, t_0$ , which clearly has a natural continuation such that

$$|\Phi_t| \leq \Psi(\mathbf{X}_t, \mathbf{V}_l) + \rho^2 t_0 \leq 1 + \rho^2 t_0,$$

for any  $t$  including  $t > t_0$ . And

$$\begin{aligned} \mathbb{E}[\Phi_{t+1} | \mathbf{X}_t] &= \mathbb{E}[\Psi(\mathbf{X}_{t+1}, \mathbf{V}_l) | \mathbf{X}_t] - \rho^2(t+1) \\ &\leq \Psi(\mathbf{X}_t, \mathbf{V}_l) + \rho^2 - \rho^2(t+1) \\ &= \Psi(\mathbf{X}_t, \mathbf{V}_l) - \rho^2 t = \Phi_t, \end{aligned}$$

for  $t = 0, 1, \dots, t_0$ , while it is clear that  $\mathbb{E}[\Phi_{t+1} | \mathbf{X}_t] = \Phi_t$  for  $t > t_0$ . Thus,  $\{\Phi_t\}$  constitutes a super-martingale. On the other hand, by Lemma B.3., we have

$$\begin{aligned} |\Phi_{t+1} - \Phi_t| &\leq |\Psi(\mathbf{X}_{t+1}, \mathbf{V}_l) - \Psi(\mathbf{X}_t, \mathbf{V}_l)| + \rho^2 \\ &\leq \omega\rho + \rho^2 \\ &= \rho(\omega + \rho). \end{aligned}$$

Thus, we are now able to apply the Azuma-Hoeffding inequality to the super-martingale  $\{\Phi_t\}$  with bounded difference at  $\rho(\omega + \rho)$ , and then have that for any  $t > 0$  and  $r > 0$ ,

$$\begin{aligned} P(\Phi_t - \Phi_0 \geq r) &\leq \exp\left\{-\frac{r^2}{2\sum_{i=1}^t \rho^2(\omega + \rho)^2}\right\} \\ &\leq \exp\left\{-\frac{r^2}{2t_0\rho^2(\omega + \rho)^2}\right\} \\ &= \iota. \end{aligned}$$

Hence,  $r = \rho(\omega + \rho)\sqrt{2t_0 \log(1/\iota)}$  for any  $\iota \in (0, 1)$ . That is, with probability at least  $1 - \iota$ , we have  $\Phi_t - \Phi_0 < r$  and then

$$\begin{aligned} \Psi(\mathbf{X}_t, \mathbf{V}_l) &< r + \rho^2 t + \Phi_0 \\ &\leq \rho(\omega + \rho)\sqrt{2t_0 \log(1/\iota)} + \rho^2 t_0 + \Phi_0, \end{aligned}$$

for all  $t = 1, \dots, t_0$ . Therefore, for any  $\iota \in (0, 1)$  and all  $t = 1, \dots, t_0$ , if  $\rho$  and  $t_0$  are chosen such that

$$\rho^2 \sqrt{2t_0 \log(1/\iota)} + \rho^2 t_0 + \Phi_0 < 1 - \gamma,$$

then we have  $\Psi(\mathbf{X}_t, \mathbf{V}_l) < 1 - \gamma$ , namely  $\det(\mathbf{X}_t^\top \mathbf{V}_l \mathbf{V}_l^\top \mathbf{X}_t) > \gamma$ , with probability at least  $1 - \iota$ .  $\square$

**Remark** When  $\Psi(\mathbf{X}_0, \mathbf{V}_l) < 1 - \gamma$ , there exists  $\rho$  such that  $\rho^2 \sqrt{2t_0 \log(1/\iota)} + \rho^2 t_0 + \Phi_0 < 1 - \gamma$  holds.

### Part C. Proofs of Main Lemmas

**Lemma 4.5.** If  $\Psi(\mathbf{X}_t, \mathbf{V}_l) < 1 - \gamma$ ,  $0 < \alpha_{t+1} < \rho$ , and  $0 < \gamma < 1$ , we have

$$\mathbb{E}[\Psi(\mathbf{X}_{t+1}, \mathbf{V}_l) | \mathbf{X}_t] \leq \Psi(\mathbf{X}_t, \mathbf{V}_l) - 2\alpha_{t+1}(1 - \Psi(\mathbf{X}_t, \mathbf{V}_l))E(\mathbf{X}_t) + \alpha_{t+1}^2 \eta \Psi(\mathbf{X}_t, \mathbf{V}_k) + \alpha_{t+1}^2 \xi \beta_t,$$

where

$$E(\mathbf{X}_t) = \begin{cases} \text{tr}(\mathbf{Q}_{l,t}^\top \Sigma_l \mathbf{Q}_{l,t}) - \text{tr}(\mathbf{X}_t^\top \mathbf{A} \mathbf{X}_t), & l \geq k \\ \text{tr}(\Sigma_l) - \text{tr}(\mathbf{Q}_{l,t}^\top \mathbf{X}_t^\top \mathbf{A} \mathbf{X}_t \mathbf{Q}_{l,t}), & l < k \end{cases},$$

$$\mathbf{X}_t^\top \mathbf{V}_l = \begin{cases} \mathbf{P}_{l,t} \Lambda_{l,t} \mathbf{Q}_{l,t}^\top, & l \geq k \\ \mathbf{Q}_{l,t} \Lambda_{l,t} \mathbf{P}_{l,t}^\top, & l < k \end{cases}$$

represents the thin SVD of  $\mathbf{X}_t^\top \mathbf{V}_l$ , and

$$\beta_t = \begin{cases} 0, & \text{Solver 1} \\ 1, & \text{Solver 2} \\ \Psi(\mathbf{X}_t, \mathbf{V}_k) + \Psi(\tilde{\mathbf{X}}_{s-1}, \mathbf{V}_k), & \text{Solver 3} \end{cases}.$$

*Proof.* We only consider the case that  $l \geq k$ , as the case of  $l < k$  is similar. When  $\varrho_t \geq 0$ , by Lemma B.5 we have

$$\begin{aligned} & \frac{\det(a_1(\mathbf{X}_t))}{\det(a_2(\mathbf{X}_t))} \\ & \geq \frac{\varrho_t}{1 + \zeta_t \alpha_{t+1}^2 (k^{1/2} \beta_t + \delta_t^2)} \\ & = \frac{(1 - \zeta_t \alpha_{t+1}^2 (k^{1/2} \beta_t + \delta_t^2)) \varrho_t}{1 - (\zeta_t \alpha_{t+1}^2 (k^{1/2} \beta_t + \delta_t^2))^2} \\ & \geq \left(1 - \zeta_t \alpha_{t+1}^2 (k^{1/2} \beta_t + \delta_t^2)\right) \varrho_t \\ & = \varrho_t - \zeta_t \alpha_{t+1}^2 (k^{1/2} \beta_t + \delta_t^2) \varrho_t \\ & \geq \det(\mathbf{X}_t^\top \mathbf{V}_l \mathbf{V}_l^\top \mathbf{X}_t) + 2\alpha_{t+1} \det(\mathbf{X}_t^\top \mathbf{V}_l \mathbf{V}_l^\top \mathbf{X}_t) E(\mathbf{X}_t) - \eta_t \alpha_{t+1}^2 \delta_t^2 - \zeta_t \alpha_{t+1}^2 (k^{1/2} \beta_t + \delta_t^2) \varrho_t \\ & = \det(\mathbf{X}_t^\top \mathbf{V}_l \mathbf{V}_l^\top \mathbf{X}_t) + 2\alpha_{t+1} \det(\mathbf{X}_t^\top \mathbf{V}_l \mathbf{V}_l^\top \mathbf{X}_t) E(\mathbf{X}_t) - (\eta_t + \zeta_t \varrho_t) \alpha_{t+1}^2 \delta_t^2 - k^{1/2} \zeta_t \varrho_t \alpha_{t+1}^2 \beta_t. \end{aligned}$$

We then can get

$$\begin{aligned} \mathbb{E} \left[ \Psi(\mathbf{X}_{t+1}, \mathbf{V}_l) \middle| \mathbf{X}_t \right] & \leq \Psi(\mathbf{X}_t, \mathbf{V}_l) - 2\alpha_{t+1} \det(\mathbf{X}_t^\top \mathbf{V}_l \mathbf{V}_l^\top \mathbf{X}_t) E(\mathbf{X}_t) + \\ & \quad (\eta_t + \zeta_t \varrho_t) \alpha_{t+1}^2 \delta_t^2 + \left( k^{1/2} \zeta_t \varrho_t + \xi \right) \alpha_{t+1}^2 \beta_t \\ & \leq \Psi(\mathbf{X}_t, \mathbf{V}_l) - 2\alpha_{t+1} (1 - \Psi(\mathbf{X}_t, \mathbf{V}_l)) E(\mathbf{X}_t) + \\ & \quad \alpha_{t+1}^2 \eta \Psi(\mathbf{X}_t, \mathbf{V}_k) + \alpha_{t+1}^2 \xi \beta_t, \end{aligned}$$

where some missing constants are absorbed into the constants  $\eta$  and  $\xi$ .  $\square$

**Lemma 4.6.**

- 1)  $E(\mathbf{X}) \leq (\lambda_1 - \lambda_n)\Theta(\mathbf{X}, \mathbf{V}_l) \leq k(\lambda_1 - \lambda_n)\Psi(\mathbf{X}, \mathbf{V}_l)$ ,
- 2)  $E(\mathbf{X}) \geq \Delta_l\Theta(\mathbf{X}, \mathbf{V}_l) \geq \Delta_l\Psi(\mathbf{X}, \mathbf{V}_l)$ ,

*Proof.* We consider  $l \geq k$  and omit subscript  $t$  here. Note that  $\mathbf{A} = \mathbf{V}_l \Sigma_l \mathbf{V}_l^\top + \mathbf{V}_l^\perp \Sigma_l^\perp (\mathbf{V}_l^\perp)^\top$ . Then

$$\begin{aligned}
 E(\mathbf{X}) &= \text{tr}(\mathbf{Q}_{l,t}^\top \Sigma_l \mathbf{Q}_{l,t}) - \text{tr}(\mathbf{X}^\top \mathbf{A} \mathbf{X}) \\
 &= \text{tr}(\mathbf{Q}_{l,t}^\top \Sigma_l \mathbf{Q}_{l,t}) - \text{tr}(\mathbf{X}^\top \mathbf{V}_l \Sigma_l \mathbf{V}_l^\top \mathbf{X}) - \text{tr}(\mathbf{X}^\top \mathbf{V}_l^\perp \Sigma_l^\perp (\mathbf{V}_l^\perp)^\top \mathbf{X}) \\
 &= \text{tr}(\Sigma_l \mathbf{Q}_{l,t} \mathbf{Q}_{l,t}^\top) - \text{tr}(\Sigma_l \mathbf{Q}_{l,t} \Lambda_{l,t}^2 \mathbf{Q}_{l,t}^\top) - \text{tr}(\mathbf{X}^\top \mathbf{V}_l^\perp \Sigma_l^\perp (\mathbf{V}_l^\perp)^\top \mathbf{X}) \\
 &= \text{tr}(\Sigma_l \mathbf{Q}_{l,t} (\mathbf{I} - \Lambda_{l,t}^2) \mathbf{Q}_{l,t}^\top) - \text{tr}(\mathbf{X}^\top \mathbf{V}_l^\perp \Sigma_l^\perp (\mathbf{V}_l^\perp)^\top \mathbf{X}) \\
 &\leq \lambda_1 \text{tr}(\mathbf{Q}_{l,t} (\mathbf{I} - \Lambda_{l,t}^2) \mathbf{Q}_{l,t}^\top) - \lambda_n \text{tr}(\mathbf{X}^\top \mathbf{V}_l^\perp \Sigma_l^\perp (\mathbf{V}_l^\perp)^\top \mathbf{X}) \\
 &= \lambda_1 \text{tr}(\mathbf{I} - \Lambda_{l,t}^2) - \lambda_n \text{tr}(\mathbf{X}^\top (\mathbf{I} - \mathbf{V}_l \mathbf{V}_l^\top) \mathbf{X}) \\
 &= (\lambda_1 - \lambda_n)(k - \|\mathbf{X}^\top \mathbf{V}_l\|_F^2) = (\lambda_1 - \lambda_n)\Theta(\mathbf{X}, \mathbf{V}_l) \\
 &\leq k(\lambda_1 - \lambda_n)\Psi(\mathbf{X}, \mathbf{V}_l),
 \end{aligned}$$

and

$$\begin{aligned}
 E(\mathbf{X}) &= \text{tr}(\Sigma_l \mathbf{Q}_{l,t} (\mathbf{I} - \Lambda_{l,t}^2) \mathbf{Q}_{l,t}^\top) - \text{tr}(\mathbf{X}^\top \mathbf{V}_l^\perp \Sigma_l^\perp (\mathbf{V}_l^\perp)^\top \mathbf{X}) \\
 &\geq \lambda_l \text{tr}(\mathbf{Q}_{l,t} (\mathbf{I} - \Lambda_{l,t}^2) \mathbf{Q}_{l,t}^\top) - \lambda_{l+1} \text{tr}(\mathbf{X}^\top \mathbf{V}_l^\perp \Sigma_l^\perp (\mathbf{V}_l^\perp)^\top \mathbf{X}) \\
 &= \Delta_l \Theta(\mathbf{X}, \mathbf{V}_l) \geq \Delta_l \Psi(\mathbf{X}, \mathbf{V}_l).
 \end{aligned}$$

□

**Lemma 4.7.** For a uniformly sampled point  $\mathbf{Y} \in \text{Grass}(n, l)$  with  $l < \frac{n+1}{2}$  and  $0 < \gamma < 1$ , we have that

$$\det^2(\mathbf{Y}^\top \mathbf{V}_l) > \gamma$$

with probability at least

$$1 - p_l(\gamma) = \frac{\Gamma(\frac{l+1}{2})\Gamma(\frac{n-l+1}{2})}{\Gamma(\frac{1}{2})\Gamma(\frac{n+1}{2})} (\sin(\cos^{-1}(\gamma^{\frac{1}{2l}})))^{l(n-l)} {}_2F_1\left(\frac{n-l}{2}, \frac{1}{2}, \frac{n+1}{2}; \mathbf{I}_{l \times l} \sin^2(\cos^{-1}(\gamma^{\frac{1}{2l}}))\right),$$

where  ${}_2F_1$  is the Gaussian hypergeometric function of matrix argument.

*Proof.* Let  $\theta_{\max} = \max_i \theta_i(\mathbf{Y}, \mathbf{V}_l)$ . First, we have

$$\begin{aligned}
 P(\det^2(\mathbf{Y}^\top \mathbf{V}_l) > \gamma) &= P\left(\prod_{i=1}^l \cos^2 \theta_i \geq \gamma\right) \\
 &\geq P\left(\left(\min_i \cos \theta_i\right)^{2l} \geq \gamma\right) \\
 &= P(\cos^{2l} \theta_{\max} \geq \gamma) \\
 &= P\left(\theta_{\max} \leq \cos^{-1} \gamma^{\frac{1}{2l}}\right).
 \end{aligned}$$

According to Absil et al. (2006),

$$\begin{aligned}
 &P\left(\theta_{\max} \leq \cos^{-1} \gamma^{\frac{1}{2l}}\right) \\
 &= \frac{\Gamma(\frac{l+1}{2})\Gamma(\frac{n-l+1}{2})}{\Gamma(\frac{1}{2})\Gamma(\frac{n+1}{2})} \left(\sin\left(\cos^{-1}\left(\gamma^{\frac{1}{2l}}\right)\right)\right)^{l(n-l)} {}_2F_1\left(\frac{n-l}{2}, \frac{1}{2}, \frac{n+1}{2}; \mathbf{I}_{l \times l} \sin^2\left(\cos^{-1}\left(\gamma^{\frac{1}{2l}}\right)\right)\right) \\
 &\triangleq 1 - p_l(\gamma).
 \end{aligned}$$

□

**Remark 1** There is no doubt that  $p_l(\gamma) \rightarrow 0$  as  $\gamma \rightarrow 0$ , because  $\det^2(\mathbf{Y}^\top \mathbf{V}_l) \in [0, 1]$ . In fact,  $p_l(\gamma)$  is the integral of the probability density function of the largest principal angle  $\max_i \theta_i$  between two random points in  $\text{Grass}(n, l)$ , on the interval  $[\cos^{-1}(\gamma^{\frac{1}{2l}}), \frac{\pi}{2}] \subset [0, \frac{\pi}{2}]$ . It says that although in the high yet finite dimensional regime two random points in  $\text{Grass}(n, l)$  are nearly orthogonal to each other with high probability, the probability of attaining the orthogonality of high precision is quite small, especially that the probability  $P(\max_i \theta_i(\mathbf{Y}, \mathbf{V}_l) = \frac{\pi}{2})$  is zero because  $\{\mathbf{X} \in \text{Grass}(n, l) : \max_i \theta_i(\mathbf{Y}, \mathbf{V}_l) = \frac{\pi}{2}\}$  is a zero-measure set. See Absil et al. (2006) for more details as well as a pictorial view of the density function in a low-dimensional setting.

**Remark 2** What we need from this lemma is to get an initial  $\mathbf{X}_0 \in \text{Grass}(n, k)$  such that  $\Psi(\mathbf{X}_0, \mathbf{V}_l) < 1 - \gamma$  with high probability. There is no problem when  $l = k$  as it can be directly given by the lemma. However, if  $l \leq k$ , i.e.,  $l = k_{\min}$  or  $l = k_{\max}$  in our case, this would be different. Theoretically, there are four cases:

1. When  $\Delta_k > 0$ , it is a direct application of the lemma by letting  $l = k$  in the lemma.
2. When  $\Delta_k = 0$  and  $k_{\max} = n$ , we only need to show that  $\Psi(\mathbf{X}_t, \mathbf{V}_{k_{\min}}) < \epsilon$ . Thus, we need  $\Psi(\mathbf{X}_0, \mathbf{V}_{k_{\min}}) < 1 - \gamma$  with high probability. Fortunately, we can make it as in the above case. The reason is that  $\Psi(\mathbf{X}_0, \mathbf{V}_k) < 1 - \gamma$  implies that  $\Psi(\mathbf{X}_0, \mathbf{V}_{k_{\min}}) < 1 - \gamma$ , and thus the latter's probability will be no less than the former's.
3. When  $\Delta_k = 0$  and  $k_{\min} = 0$ , we only need to show that  $\Psi(\mathbf{X}_t, \mathbf{V}_{k_{\max}}) < \epsilon$ . We now need  $\Psi(\mathbf{X}_0, \mathbf{V}_{k_{\max}}) < 1 - \gamma$  with high probability. To this end, we set  $\mathbf{X}_0 = \mathbf{Y}_1$  with  $\mathbf{Y} = (\mathbf{Y}_1, \mathbf{Y}_2)$  sampled uniformly from  $\text{Grass}(n, k_{\max})$ . This is only the theoretical soundness of the convergence proof. In practice, we may need to choose a  $l$  large enough to cover  $k_{\max}$ , i.e.,  $k_{\max} < l$ , then sample  $\mathbf{Y} = (\mathbf{Y}_1, \mathbf{Y}_2)$  uniformly from  $\text{Grass}(n, l)$ , and set  $\mathbf{X}_0 = \mathbf{Y}_1$ .
4. When  $\Delta_k = 0$ ,  $0 < k_{\min}$  and  $k_{\max} < n$ , we need to show that both  $\Psi(\mathbf{X}_t, \mathbf{V}_{k_{\min}}) < \epsilon$  and  $\Psi(\mathbf{X}_t, \mathbf{V}_{k_{\max}}) < \epsilon$ . For two values of  $l$ , i.e.,  $k_{\min}$  and  $k_{\max}$ , we only need to sample one  $\mathbf{Y} = (\mathbf{Y}_1, \mathbf{Y}_2)$  sampled uniformly from  $\text{Grass}(n, k_{\max})$  and then set  $\mathbf{X}_0 = \mathbf{Y}_1$ , as  $\Psi(\mathbf{Y}, \mathbf{V}_{k_{\max}}) < 1 - \gamma$  ensures  $\Psi(\mathbf{X}_0, \mathbf{V}_{k_{\min}}) < 1 - \gamma$  and  $\Psi(\mathbf{X}_0, \mathbf{V}_{k_{\max}}) < 1 - \gamma$  simultaneously.

## References

- P.-A. Absil, A. Edelman, and P. Koev. On the largest principal angle between random subspaces. *Linear Algebra Appl.*, 414(1):288–294, 2006.
